# Supplementary material for: Dynamical and Structural Analysis of a T Cell Survival Network Identifies Novel Candidate Therapeutic Targets for Large Granular Lymphocyte Leukemia
Source: PLoS Comput Biol. 2011 Nov 10;7(11):e1002267. doi: 10.1371/journal.pcbi.1002267 (PMC3213185; doi:10.1371/journal.pcbi.1002267)
Supplement: Table S2 — The full names of components in the T-LGL signaling network corresponding to the abbreviated node labels used in Figure 1 . Several network nodes represent the union of a few proteins with similar roles. In such cases, a single entry in the first column corresponds to several entries in the second column. This table and its caption are adapted from [1]. (PDF) [file pcbi.1002267.s003.pdf]

**Table S2. The full names of components in the T-LGL signaling network corresponding to the abbreviated node labels used in Figure 1.** Several network nodes represent the union of a few proteins with similar roles. In such cases, a single entry in the first column corresponds to several entries in the second column. This table and its caption are adapted from [1].

| Abbreviated node name  | Full name                                                                                                                                                                                                                                                                                                 |
|------------------------|-----------------------------------------------------------------------------------------------------------------------------------------------------------------------------------------------------------------------------------------------------------------------------------------------------------|
| PDGF                   | Platelet-derived growth factor beta polypeptide (simian sarcoma viral (v-sis) oncogene homolog)                                                                                                                                                                                                           |
| IL15                   | Interleukin 15                                                                                                                                                                                                                                                                                            |
| Stimuli                | Antigen stimulation                                                                                                                                                                                                                                                                                       |
| Stimuli2               | New or stronger antigen stimulation                                                                                                                                                                                                                                                                       |
| CD45                   | Protein tyrosine phosphatase, receptor type, C                                                                                                                                                                                                                                                            |
| TAX                    | Tax p40 (Human T-lymphotropic virus 1)                                                                                                                                                                                                                                                                    |
| CTLA4                  | Cytotoxic T-lymphocyte-associated protein 4                                                                                                                                                                                                                                                               |
| TCR                    | TCR receptor and coreceptors in CD8 cells                                                                                                                                                                                                                                                                 |
| PDGFR                  | Platelet-derived growth factor receptor, alpha polypeptide<br>Platelet-derived growth factor receptor, beta polypeptide                                                                                                                                                                                   |
| FYN                    | FYN oncogene related to SRC, FGR, YES                                                                                                                                                                                                                                                                     |
| Cytoskeleton signaling | N/A                                                                                                                                                                                                                                                                                                       |
| LCK                    | Lymphocyte-specific protein tyrosine kinase                                                                                                                                                                                                                                                               |
| ZAP70                  | Zeta-chain (TCR) associated protein kinase 70kDa                                                                                                                                                                                                                                                          |
| GRB2                   | Growth factor receptor-bound protein 2                                                                                                                                                                                                                                                                    |
| PLCG1                  | Phospholipase C, gamma 1                                                                                                                                                                                                                                                                                  |
| RAS                    | v-Ha-ras Harvey rat sarcoma viral oncogene homolog                                                                                                                                                                                                                                                        |
| GAP                    | RAS p21 protein activator (GTPase activating protein) 1                                                                                                                                                                                                                                                   |
| MEK                    | Mitogen-activated protein kinase kinase 1<br>Mitogen-activated protein kinase kinase 2                                                                                                                                                                                                                    |
| ERK                    | Mitogen-activated protein kinase 1<br>Mitogen-activated protein kinase 3                                                                                                                                                                                                                                  |
| PI3K                   | Phosphoinositide-3-kinase, catalytic, alpha polypeptide<br>Phosphoinositide-3-kinase, catalytic, beta polypeptide<br>Phosphoinositide-3-kinase, catalytic, gamma polypeptide                                                                                                                              |
| NFκB                   | Nuclear factor of kappa light polypeptide gene enhancer in B-cells 1 (p105)<br>Nuclear factor of kappa light polypeptide gene enhancer in B-cells 2 (p49/p100)<br>v-rel reticuloendotheliosis viral oncogene homolog A, nuclear factor of kappa light polypeptide gene enhancer in B-cells 3, p65 (avian) |
| NFAT                   | Nuclear factor of activated T cells, cytoplasmic, calcineurin-dependent 1<br>Nuclear factor of activated T cells, cytoplasmic, calcineurin-dependent 2<br>Nuclear factor of activated T cells 5, tonicity-responsive                                                                                      |
| RANTES                 | Chemokine (C-C motif) ligand 5<br>Chemokine (C-C motif) ligand 3<br>Chemokine (C-C motif) ligand 4                                                                                                                                                                                                        |
| IL2                    | Interleukin 2                                                                                                                                                                                                                                                                                             |
| IL2RBT                 | Transcript of interleukin 2 receptor, beta                                                                                                                                                                                                                                                                |
| IL2RB                  | Formation of the interleukin 2 low affinity receptor complex with interleukin 2 receptor, beta, gamma, also response to interleukin 15                                                                                                                                                                    |
| IL2RAT                 | Transcript of interleukin 2 receptor, alpha                                                                                                                                                                                                                                                               |
| IL2RA                  | Formation of the interleukin 2 high affinity receptor complex with the interleukin 2 receptor, alpha, beta, gamma                                                                                                                                                                                         |
| JAK                    | Janus kinase 1 (a protein tyrosine kinase)<br>Janus kinase 2 (a protein tyrosine kinase)<br>Janus kinase 3 (a protein tyrosine kinase, leukocyte)                                                                                                                                                         |

|               |                                                                                                                                                                                                                                                                                                          |
|---------------|----------------------------------------------------------------------------------------------------------------------------------------------------------------------------------------------------------------------------------------------------------------------------------------------------------|
| SOCS          | Suppressor of cytokine signaling 1<br>Suppressor of cytokine signaling 2<br>Suppressor of cytokine signaling 3                                                                                                                                                                                           |
| STAT3         | Signal transducer and activator of transcription 3 (acute-phase response factor)<br>Signal transducer and activator of transcription 1, 91kDa<br>Signal transducer and activator of transcription 5A<br>Signal transducer and activator of transcription 5B                                              |
| P27           | Cyclin-dependent kinase inhibitor 2B (p15, inhibits CDK4)<br>Cyclin-dependent kinase inhibitor 1A (p21, Cip1)<br>Cyclin-dependent kinase inhibitor 1B (p27, Kip1)<br>Cyclin-dependent kinase inhibitor 1C (p57, Kip2)                                                                                    |
| Proliferation | N/A                                                                                                                                                                                                                                                                                                      |
| TBET          | T-box 21<br>Eomesodermin homolog ( <i>Xenopus laevis</i> )                                                                                                                                                                                                                                               |
| CREB          | cAMP responsive element binding protein 1                                                                                                                                                                                                                                                                |
| IFNGT         | Transcript of interferon, gamma                                                                                                                                                                                                                                                                          |
| IFNG          | Interferon, gamma                                                                                                                                                                                                                                                                                        |
| P2            | N/A                                                                                                                                                                                                                                                                                                      |
| GZMB          | Granzyme B (granzyme 2, cytotoxic T-lymphocyte-associated serine esterase 1)<br>Perforin 1 (pore forming protein)                                                                                                                                                                                        |
| TPL2          | Mitogen-activated protein kinase kinase kinase 8                                                                                                                                                                                                                                                         |
| TNF           | Tumor necrosis factor (TNF superfamily, member 2)                                                                                                                                                                                                                                                        |
| TRADD         | TNFRSF1A-associated via death domain                                                                                                                                                                                                                                                                     |
| FasL          | Fas ligand (TNF superfamily, member 6)                                                                                                                                                                                                                                                                   |
| FasT          | Transcript of Fas (TNF receptor superfamily, member 6)                                                                                                                                                                                                                                                   |
| Fas           | Fas (TNF receptor superfamily, member 6)                                                                                                                                                                                                                                                                 |
| sFas          | Fas (TNF receptor superfamily, member 6), soluble Fas                                                                                                                                                                                                                                                    |
| Ceramide      | Ceramide                                                                                                                                                                                                                                                                                                 |
| DISC          | Death inducing signaling complex                                                                                                                                                                                                                                                                         |
| Caspase       | Caspase 3, apoptosis-related cysteine peptidase<br>Caspase 8, apoptosis-related cysteine peptidase                                                                                                                                                                                                       |
| FLIP          | CASP8 and FADD-like apoptosis regulator                                                                                                                                                                                                                                                                  |
| A20           | Tumor necrosis factor, alpha-induced protein 3                                                                                                                                                                                                                                                           |
| BID           | BH3 interacting domain death agonist<br>BCL2-like 11 (apoptosis facilitator)                                                                                                                                                                                                                             |
| IAP           | Baculoviral IAP repeat-containing 2<br>Baculoviral IAP repeat-containing 3<br>Baculoviral IAP repeat-containing 4                                                                                                                                                                                        |
| BclxL         | BCL2-like 1<br>B-cell CLL/lymphoma 2                                                                                                                                                                                                                                                                     |
| MCL1          | Myeloid cell leukemia sequence 1 (BCL2-related)                                                                                                                                                                                                                                                          |
| Apoptosis     | N/A                                                                                                                                                                                                                                                                                                      |
| GPCR          | Endothelial differentiation, sphingolipid G protein-coupled receptor, 1<br>Endothelial differentiation, sphingolipid G protein-coupled receptor, 3<br>Endothelial differentiation, sphingolipid G protein-coupled receptor, 5<br>Endothelial differentiation, sphingolipid G protein-coupled receptor, 8 |
| SMAD          | SMAD family member 2<br>SMAD family member 3<br>SMAD family member 4                                                                                                                                                                                                                                     |
| SPHK1         | Sphingosine kinase 1                                                                                                                                                                                                                                                                                     |
| S1P           | Sphingosine-1-phosphate                                                                                                                                                                                                                                                                                  |

## Reference

1. Zhang R, Shah MV, Yang J, Nyland SB, Liu X, et al. (2008) Network model of survival signaling in large granular lymphocyte leukemia. *Proc Natl Acad Sci U S A* 105: 16308-16313.
