# Supplementary material for: Dynamical and Structural Analysis of a T Cell Survival Network Identifies Novel Candidate Therapeutic Targets for Large Granular Lymphocyte Leukemia
Source: PLoS Comput Biol. 2011 Nov 10;7(11):e1002267. doi: 10.1371/journal.pcbi.1002267 (PMC3213185; doi:10.1371/journal.pcbi.1002267)
Supplement: Table S3 — Boolean rules governing the state of the 18-node sub-network depicted in Figure 2A . For simplicity, the nodes' states are represented by the node names. The symbol * indicates the future state of the marked node. (PDF) [file pcbi.1002267.s004.pdf]

**Table S3. Boolean rules governing the state of the 18-node sub-network depicted in Figure 2A.** For simplicity, the nodes' states are represented by the node names. The symbol \* indicates the future state of the marked node.

| <b>Node</b> | <b>Boolean rule</b>                                        |
|-------------|------------------------------------------------------------|
| CTLA4       | CTLA4* = TCR AND NOT Apoptosis                             |
| TCR         | TCR * = NOT (CTLA4 OR Apoptosis)                           |
| CREB        | CREB * = IFNG AND NOT Apoptosis                            |
| IFNG        | IFNG * = NOT (SMAD OR P2 OR Apoptosis)                     |
| P2          | P2* = (IFNG OR P2) AND NOT Apoptosis                       |
| GPCR        | GPCR * = S1P AND NOT Apoptosis                             |
| SMAD        | SMAD * = GPCR AND NOT Apoptosis                            |
| Fas         | Fas * = NOT (sFas OR Apoptosis)                            |
| sFas        | sFas* = S1P AND NOT Apoptosis                              |
| Ceramide    | Ceramide* = Fas AND NOT (S1P or Apoptosis)                 |
| DISC        | DISC* = (Ceramide OR (Fas AND NOT FLIP)) AND NOT Apoptosis |
| Caspase     | Caspase*= ((BID AND NOT IAP) OR DISC) AND NOT Apoptosis    |
| FLIP        | FLIP* = NOT (DISC OR Apoptosis)                            |
| BID         | BID* = NOT (MCL1 OR Apoptosis)                             |
| IAP         | IAP* = NOT (BID OR Apoptosis)                              |
| MCL1        | MCL1* = NOT (DISC OR Apoptosis)                            |
| S1P         | S1P* = NOT (Ceramide OR Apoptosis)                         |
| Apoptosis   | Apoptosis* = Caspase OR Apoptosis                          |
